# Supplementary material for: Rapid HPLC-DAD and Chemometric Discrimination of Raw Dark Tea from Three Specific Mountain Origins Within Anhua
Source: MDPI journal article supplement (doi:10.3390/foods15101664), 2026-05-10
Supplement: s1 [file foods-4237271-supplementary.pdf › foods-4237271-supplementary.pdf]

**Rapid HPLC-DAD and Chemometric Discrimination of Raw Dark Tea from Three Specific Mountain Origins in Anhua**

Wenyan Zeng, Chunlin Wu, Guiying Lu, Meng Dong, Xiaohong Zhou and Xiangdong Qing

**Table S1.** Predicted concentrations of eight standard substances in 21 samples from Furongshan ( $\mu\text{g/mL}$ ).

| Samples from Furong Mountain. | predicted values ( $\mu\text{g/mL}$ ) |       |        |     |       |       |        |      |
|-------------------------------|---------------------------------------|-------|--------|-----|-------|-------|--------|------|
|                               | GC                                    | EGC   | EGCG   | GCG | EC    | ECG   | CAF    | CG   |
| FR01                          | 2.59                                  | 13.02 | 65.48  | 0   | 17.06 | 15.99 | 107.16 | 0    |
| FR02                          | 3.05                                  | 23.13 | 123.30 | 0   | 20.72 | 16.62 | 163.01 | 0    |
| FR03                          | 3.11                                  | 25.78 | 71.75  | 0   | 21.71 | 13.50 | 101.76 | 0    |
| FR04                          | 1.92                                  | 31.27 | 31.67  | 0   | 22.89 | 4.00  | 104.42 | 0    |
| FR05                          | 2.37                                  | 7.64  | 11.37  | 0   | 13.89 | 0.94  | 70.57  | 0    |
| FR06                          | 2.35                                  | 18.71 | 21.56  | 0   | 20.64 | 0.85  | 67.62  | 0    |
| FR07                          | 4.23                                  | 19.35 | 198.22 | 0   | 22.12 | 38.06 | 171.26 | 1.12 |
| FR08                          | 8.75                                  | 18.48 | 125.00 | 0   | 19.73 | 15.87 | 152.08 | 0    |
| FR09                          | 1.60                                  | 9.92  | 6.00   | 0   | 14.07 | 0     | 65.67  | 0    |
| FR10                          | 2.46                                  | 17.63 | 28.07  | 0   | 17.64 | 2.94  | 67.59  | 0    |
| FR11                          | 0.62                                  | 5.34  | 0.56   | 0   | 11.90 | 0     | 59.36  | 0    |
| FR12                          | 2.42                                  | 17.90 | 24.79  | 0   | 18.55 | 0.37  | 68.03  | 0    |
| FR13                          | 2.84                                  | 14.74 | 10.09  | 0   | 20.42 | 0     | 104.75 | 0    |
| FR14                          | 2.25                                  | 15.49 | 16.09  | 0   | 17.14 | 0     | 92.81  | 0    |
| FR15                          | 1.52                                  | 11.14 | 50.74  | 0   | 18.77 | 14.93 | 149.55 | 0    |
| FR16                          | 2.08                                  | 14.57 | 23.62  | 0   | 19.37 | 4.19  | 87.82  | 0    |
| FR17                          | 3.06                                  | 14.62 | 147.05 | 0   | 23.22 | 31.80 | 150.72 | 0.27 |
| FR18                          | 3.33                                  | 11.91 | 4.93   | 0   | 15.54 | 0     | 59.11  | 0    |
| FR19                          | 1.65                                  | 8.91  | 39.21  | 0   | 17.57 | 12.33 | 130.33 | 0.11 |
| FR20                          | 3.19                                  | 8.32  | 6.49   | 0   | 16.23 | 0     | 59.78  | 0    |
| FR21                          | 2.72                                  | 26.87 | 104.17 | 0   | 30.50 | 25.61 | 146.52 | 1.10 |
| FR22                          | 3.05                                  | 12.23 | 150.73 | 0   | 22.58 | 32.57 | 142.93 | 1.14 |

**Table S2.** Predicted concentrations of eight standard substances in 18 samples from Gaoma Erxi ( $\mu\text{g/mL}$ ).

| Samples from Gaoma Erxi. | predicted values ( $\mu\text{g/mL}$ ) |       |       |     |       |      |       |    |
|--------------------------|---------------------------------------|-------|-------|-----|-------|------|-------|----|
|                          | GC                                    | EGC   | EGCG  | GCG | EC    | ECG  | CAF   | CG |
| GMEX01                   | 2.00                                  | 18.54 | 23.80 | 0   | 19.10 | 0    | 62.96 | 0  |
| GMEX02                   | 0                                     | 33.19 | 12.80 | 0   | 23.68 | 0.20 | 75.09 | 0  |
| GMEX03                   | 1.37                                  | 20.01 | 29.93 | 0   | 18.74 | 5.26 | 94.88 | 0  |
| GMEX04                   | 0.68                                  | 20.34 | 14.35 | 0   | 18.16 | 1.49 | 81.89 | 0  |
| GMEX05                   | 5.42                                  | 17.79 | 30.09 | 0   | 19.08 | 0    | 99.91 | 0  |

|        |      |       |        |   |       |       |        |      |
|--------|------|-------|--------|---|-------|-------|--------|------|
| GMEX06 | 0    | 2.53  | 0      | 0 | 10.46 | 0     | 1.78   | 0    |
| GMEX07 | 2.14 | 31.81 | 29.79  | 0 | 22.13 | 3.04  | 70.74  | 0    |
| GMEX08 | 0.18 | 3.08  | 0      | 0 | 11.74 | 0     | 57.34  | 0    |
| GMEX09 | 2.10 | 12.89 | 10.13  | 0 | 15.10 | 2.55  | 46.04  | 0    |
| GMEX10 | 1.45 | 24.91 | 26.93  | 0 | 24.81 | 2.13  | 88.20  | 0.81 |
| GMEX11 | 2.44 | 50.29 | 68.95  | 0 | 46.86 | 16.26 | 136.88 | 3.68 |
| GMEX12 | 2.31 | 14.78 | 22.66  | 0 | 21.77 | 1.83  | 106.34 | 0.69 |
| GMEX13 | 2.13 | 20.06 | 26.67  | 0 | 24.95 | 0     | 76.83  | 0.08 |
| GMEX14 | 0.52 | 2.77  | 0      | 0 | 13.96 | 0     | 137.10 | 0.09 |
| GMEX15 | 3.14 | 21.88 | 55.78  | 0 | 31.09 | 10.16 | 106.73 | 0.61 |
| GMEX16 | 0.28 | 26.34 | 49.36  | 0 | 30.83 | 12.27 | 173.40 | 2.19 |
| GMEX17 | 1.64 | 15.24 | 22.34  | 0 | 27.01 | 2.38  | 83.85  | 0.94 |
| GMEX18 | 8.74 | 54.91 | 202.86 | 0 | 56.85 | 46.80 | 160.28 | 7.18 |

**Table S3.** Predicted concentrations of eight standard substances in 23 samples from Yuntaishan (µg/mL).

| Samples from Yuntaishan. | predicted values (µg/mL) |       |        |     |       |       |        |      |
|--------------------------|--------------------------|-------|--------|-----|-------|-------|--------|------|
|                          | GC                       | EGC   | EGCG   | GCG | EC    | ECG   | CAF    | CG   |
| YTS01                    | 1.88                     | 10.30 | 107.20 | 0   | 20.69 | 21.11 | 127.43 | 0.48 |
| YTS02                    | 1.77                     | 8.78  | 37.50  | 0   | 18.85 | 6.59  | 112.63 | 0.03 |
| YTS03                    | 2.50                     | 15.94 | 157.04 | 0   | 23.22 | 38.56 | 128.28 | 1.69 |
| YTS04                    | 2.02                     | 9.55  | 20.93  | 0   | 16.01 | 0     | 81.71  | 0    |
| YTS05                    | 1.64                     | 13.17 | 32.33  | 0   | 21.62 | 11.10 | 111.40 | 0.13 |
| YTS06                    | 2.31                     | 15.99 | 18.32  | 0   | 20.88 | 2.85  | 96.60  | 0    |
| YTS07                    | 1.78                     | 6.84  | 38.73  | 0   | 17.12 | 7.74  | 110.49 | 0.53 |
| YTS08                    | 4.52                     | 32.21 | 115.54 | 0   | 39.87 | 24.41 | 149.44 | 1.22 |
| YTS09                    | 2.73                     | 3.66  | 50.37  | 0   | 16.19 | 11.55 | 145.89 | 0    |
| YTS10                    | 4.42                     | 33.10 | 152.89 | 0   | 38.45 | 23.13 | 147.97 | 0.88 |
| YTS11                    | 1.32                     | 7.42  | 2.27   | 0   | 16.83 | 0     | 52.85  | 0    |
| YTS12                    | 1.07                     | 4.64  | 0.82   | 0   | 13.50 | 0     | 68.86  | 0    |
| YTS13                    | 4.08                     | 24.40 | 139.54 | 0   | 28.24 | 22.37 | 143.89 | 1.43 |
| YTS14                    | 4.34                     | 22.10 | 171.37 | 0   | 32.95 | 26.19 | 136.43 | 1.18 |
| YTS15                    | 1.17                     | 9.15  | 14.29  | 0   | 19.04 | 0     | 88.76  | 0    |
| YTS16                    | 1.80                     | 13.84 | 8.41   | 0   | 20.44 | 0     | 86.31  | 0    |
| YTS17                    | 3.45                     | 35.07 | 76.80  | 0   | 33.74 | 8.47  | 156.41 | 1.64 |
| YTS18                    | 6.20                     | 29.74 | 37.55  | 0   | 27.45 | 0     | 101.48 | 0.22 |
| YTS19                    | 1.61                     | 11.92 | 20.34  | 0   | 17.92 | 0.92  | 82.99  | 0    |
| YTS20                    | 4.41                     | 11.08 | 63.84  | 0   | 20.84 | 7.75  | 152.98 | 0.79 |
| YTS21                    | 3.22                     | 33.45 | 27.88  | 0   | 32.11 | 0.76  | 174.18 | 0.78 |
| YTS22                    | 3.05                     | 26.59 | 143.61 | 0   | 28.04 | 26.15 | 131.20 | 1.14 |
| YTS23                    | 3.76                     | 26.63 | 51.93  | 0   | 30.48 | 8.55  | 101.63 | 0    |

**Table S4.** Orthogonal experimental design L9(3<sup>4</sup>) for t-SNE hyperparameter optimization.

| Case | Perplexity | Learning Rate | Iterations | Early Exaggeration | Silhouette Coefficient | Classification accuracy (%) |
|------|------------|---------------|------------|--------------------|------------------------|-----------------------------|
| 1    | 5          | 10            | 250        | 4                  | 0.64                   | 42.9                        |
| 2    | 5          | 100           | 500        | 8                  | 0.45                   | 71.4                        |
| 3    | 5          | 1000          | 1000       | 12                 | 0.51                   | 71.4                        |
| 4    | 20         | 10            | 500        | 12                 | 0.43                   | 71.4                        |
| 5    | 20         | 100           | 1000       | 4                  | 0.51                   | 71.4                        |
| 6    | 20         | 1000          | 250        | 8                  | 0.69                   | 71.4                        |
| 7    | 50         | 10            | 1000       | 8                  | 0.49                   | 71.4                        |
| 8    | 50         | 100           | 250        | 12                 | 0.82                   | 85.7                        |
| 9    | 50         | 1000          | 500        | 4                  | 0.28                   | 85.7                        |

**Optimal configuration (Case 8):** Perplexity = 50, Learning Rate = 100, Iterations = 250, Early Exaggeration = 12.
